# Supplementary material for: Determinants of Uptake of Childhood Immunization in Gboko, Benue State, Nigeria: A Cross–Sectional Study
Source: Research Square preprint supplement (doi:10.21203/rs.3.rs-6478045/v1), 2025-05-13
Supplement: Supplementary file 1 [file ded6f81e2dc0831a843b856f.docx]

**QUESTIONNAIRE**

This survey is intended to assess the uptake and determinants of childhood immunization in Gboko, Benue State, Nigeria. Please feel free to answer questions to the best of your capability, with the assurance that this study is purely for academic purposes and that your response will facilitate the improvement of immunization services in this area to promote better uptake. Your participation is completely voluntary, and you do not have to answer any questions you are not comfortable with. Be assured that your responses are confidential

| **S/N** | **Variable** | **Definition & Coding** |
| --- | --- | --- |
|  | | |
| **Part A: Sociodemographic characteristics of respondents** | | |
| 1 | Age of the child (years) |  |
| 2 | Age of the mother/caregiver (years) |  |
| 3 | Sex of the child | 1 = male;  2 = female |
| 4 | Marital status | 0 = Not currently married;  1 = married/co-habiting;  2 = widowed/divorced |
| 5 | The education level of the mother | 0 = No formal education;  1 = Primary;  2 = Secondary;  3 = Tertiary and above |
| 6 | Number of under 5 children | 1 = 0–1;  2 = 2–3;  3 = ≥ 4 |
| 7 | Occupation of mother | 0 = Unemployed;  1 = Farmer;  2 = Petty trading;  3 = Government worker;  4 = Employed in private sector; 5 = Big business;  6 = Self-employed;  7 = Others specify ___________ |
| 8 | Wealth index | 0 = Poorest  1 = Poor  2 = Middle  3 = Rich  4 = Richest |
| 9 | Place of delivery | 1 = Home  2 = Health facility |
| 10 | Ante-natal attendance | 0 = No ANC  1 = Attended ANC |
| 11 | Postnatal care | 0 = No  1 = Yes |
| 12 | Decision-making on immunization | 1 = Father  2 = Mother  3 = Both |
| 13 | Media exposure  Radio  TV  Newspaper | 0 = Never; 1 = Sometimes  0 = No; 1 = Yes  0 = No; 1 = Yes  0 = No; 1 = Yes |
| **Part B: Knowledge of respondents towards immunization** | | |
| 14 | Are you sure that vaccinations are important for your child? | 0 = No  1 = Yes  2 = Don’t know |
| 15 | Do you think vaccination reduces the probability of death or illness in a child? | 0 = No  1 = Yes  2 = Don’t know |
| 16 | Do you think vaccinations reduce the transmission of infectious diseases? | 0 = No  1 = Yes  2 = Don’t know |
| 17 | Do you think vaccinations is some business venture for health workers? | 0 = No  1 = Yes  2 = Don’t know |
| 18 | Do you believe that vaccinations correspond to a certain age? | 0 = No  1 = Yes  2 = Don’t know |
| 19 | Are you aware that there are many types of vaccines? | 0 = No  1 = Yes  2 = Don’t know |
| 20 | Are you aware that some vaccinations are accompanied by side effects such as fever? | 0 = No  1 = Yes  2 = Don’t know |
| 21 | Do you think vaccination is a means of depopulating the African race? | 0 = No  1 = Yes  2 = Don’t know |
| 22 | Are you aware of the serious diseases that are preventable by vaccination, such as polio, measles, and meningitis? | 0 = No  1 = Yes  2 = Don’t know |
| 23 | Are you aware that even healthy children need vaccination? | 0 = No  1 = Yes  2 = Don’t know |
| **Part C: Attitude of Respondents Towards Immunization** | | |
| 24 | Do you consider immunization to be safe for your child? | 0 = DA; 1 = NS; 2 = A |
| 25 | Do you feel it is necessary to immunize your child fully? | 0 = DA; 1 = NS; 2 = A |
| 26 | Would you advise your friends, family members, and other women to immunize their children? | 0 = DA; 1 = NS; 2 = A |
| 27 | Are you willing to buy or pay for vaccines to ensure your child is fully immunized? | 0 = DA; 1 = NS; 2 = A |
| 28 | Do the healthcare workers provide adequate information to influence your attitude towards immunization? | 0 = DA; 1 = NS; 2 = A |
| **Part D: Uptake of immunization services** | | |
| 29 | Do you have an immunization card for this child | 0 = No  1 = Yes, card seen  2 = Yes, card not seen |
| 30 | Did your child receive a vaccine at the upper arm or shoulder that usually causes a scar (BCG vaccine) | 0 = No  1 = Yes, scar seen  2 = Yes, no scar present  3 = Don’t know |
| 31 | Did your child receive the oral polio vaccine, that is drops of the vaccine in the mouth to prevent polio | 0 = No  1 = Yes  2 = Don’t know |
| 32 | Indicate which doses of the oral polio vaccine (OPV) the child received:  (Tick all that apply) | 1 = OPV 0 (at birth) [ ]  2 = OPV 1 (at 6 weeks) [ ]  3 = OPV 2 (at 10 weeks) [ ]  4 = OPV 3 (at 14 weeks) [ ] |
| 33 | Did your child receive the pentavalent vaccine, which is an injection given on the thigh sometimes at the same time as the polio drops | 0 = No  1 = Yes  2 = Don’t know |
| 34 | Indicate which doses of the pentavalent vaccine (Penta) the child received:  (Tick all that apply) | 1 = Penta 1 (at 6 weeks) [ ]  2 = Penta 2 (at 10 weeks) [ ]  3 = Penta 3 (at 14 weeks) [ ] |
| 35 | Did your child receive the pneumococcal vaccine (PCV), another injection given at the thigh usually at the same time with pentavalent | 0 = No  1 = Yes  2 = Don’t know |
| 36 | Indicate which doses of the PCV the child received:  (Tick all that apply) | 1 = PCV 1 (at 6 weeks) [ ]  2 = PCV 2 (at 10 weeks) [ ]  3 = PCV 3 (at 14 weeks) [ ] |
| 37 | Did your child receive a measles injection in the upper arm | 0 = No  1 = Yes  2 = Don’t know |
| **Part E: Facility-related factors and immunization service utilization** | | |
| 38 | Were you bothered by the waiting time at the facility? | 0 = No  1 = Yes |
| 39 | Did you pay before the vaccination? | 0 = No  1 = Yes |
| 40 | Did paying discourage you from bringing your child to the immunization clinic? | 0 = No  1 = Yes |
| 41 | Did you travel a long distance to the immunization centre? | 0 = No  1 = Yes |
| 42 | Were there vaccines at the immunization centre anytime you took your child for immunization? | 0 = No  1 = Yes |
